# Supplementary material
Source: publisher figshare collection journal article supplement (https://tandf.figshare.com/articles/dataset/_/3444905)
Supplement: Supplementary file 1 [file 1]

**Table S2.** Total ( $H_T$ ), within ( $H_S$ ), and between ( $D_{ST}$ ) population genetic diversity and the genetic differentiation coefficient ( $G_{ST}$ ) for Galician, Spanish and European onion landraces

| Locus  | Galician     |              |              |              | Spanish      |              |              |              | European     |              |              |              |
|--------|--------------|--------------|--------------|--------------|--------------|--------------|--------------|--------------|--------------|--------------|--------------|--------------|
|        | $H_S$        | $H_T$        | $D_{ST}$     | $G_{ST}$     | $H_S$        | $H_T$        | $D_{ST}$     | $G_{ST}$     | $H_S$        | $H_T$        | $D_{ST}$     | $G_{ST}$     |
| ACM004 | 0.489        | 0.575        | 0.086        | 0.150        | 0.447        | 0.524        | 0.078        | 0.148        | 0.379        | 0.488        | 0.110        | 0.224        |
| ACM006 | 0.322        | 0.390        | 0.068        | 0.174        | 0.427        | 0.544        | 0.117        | 0.215        | 0.445        | 0.748        | 0.303        | 0.405        |
| ACM045 | 0.542        | 0.676        | 0.134        | 0.198        | 0.377        | 0.462        | 0.085        | 0.185        | 0.631        | 0.666        | 0.035        | 0.053        |
| ACM091 | 0.162        | 0.177        | 0.015        | 0.082        | 0.390        | 0.504        | 0.114        | 0.226        | 0.295        | 0.636        | 0.341        | 0.536        |
| ACM101 | 0.502        | 0.600        | 0.098        | 0.163        | 0.280        | 0.303        | 0.023        | 0.075        | 0.489        | 0.525        | 0.035        | 0.068        |
| ACM119 | 0.236        | 0.272        | 0.036        | 0.133        | 0.417        | 0.567        | 0.150        | 0.265        | 0.306        | 0.598        | 0.292        | 0.488        |
| ACM124 | 0.447        | 0.569        | 0.121        | 0.213        | 0.227        | 0.304        | 0.078        | 0.255        | 0.427        | 0.679        | 0.251        | 0.370        |
| ACM134 | 0.535        | 0.674        | 0.139        | 0.206        | 0.619        | 0.775        | 0.156        | 0.201        | 0.511        | 0.712        | 0.200        | 0.282        |
| ACM138 | 0.548        | 0.652        | 0.104        | 0.159        | 0.450        | 0.704        | 0.254        | 0.361        | 0.479        | 0.712        | 0.234        | 0.328        |
| ACM146 | 0.442        | 0.476        | 0.034        | 0.070        | 0.493        | 0.496        | 0.003        | 0.006        | 0.488        | 0.529        | 0.041        | 0.078        |
| ACM187 | 0.452        | 0.548        | 0.096        | 0.175        | 0.373        | 0.462        | 0.089        | 0.193        | 0.292        | 0.591        | 0.299        | 0.507        |
| ACM387 | 0.337        | 0.456        | 0.119        | 0.261        | 0.219        | 0.324        | 0.105        | 0.324        | 0.447        | 0.518        | 0.072        | 0.138        |
| ACM443 | 0.518        | 0.641        | 0.124        | 0.193        | 0.530        | 0.693        | 0.163        | 0.235        | 0.504        | 0.731        | 0.227        | 0.311        |
| ACM446 | 0.515        | 0.575        | 0.060        | 0.105        | 0.597        | 0.714        | 0.117        | 0.164        | 0.515        | 0.621        | 0.106        | 0.170        |
| ACM449 | 0.567        | 0.610        | 0.043        | 0.071        | 0.384        | 0.398        | 0.014        | 0.036        | 0.461        | 0.595        | 0.134        | 0.225        |
| ACM463 | 0.542        | 0.671        | 0.129        | 0.192        | 0.310        | 0.351        | 0.041        | 0.118        | 0.590        | 0.649        | 0.059        | 0.091        |
| ACM504 | 0.467        | 0.517        | 0.050        | 0.097        | 0.372        | 0.624        | 0.251        | 0.403        | 0.502        | 0.576        | 0.074        | 0.128        |
| ACM520 | 0.576        | 0.698        | 0.123        | 0.176        | 0.437        | 0.527        | 0.090        | 0.171        | 0.668        | 0.757        | 0.088        | 0.117        |
| AMS14  | 0.747        | 0.875        | 0.128        | 0.147        | 0.547        | 0.667        | 0.120        | 0.181        | 0.725        | 0.851        | 0.126        | 0.148        |
| AMS16  | 0.707        | 0.816        | 0.109        | 0.134        | 0.663        | 0.810        | 0.147        | 0.181        | 0.648        | 0.835        | 0.187        | 0.224        |
| Mean   | <b>0.483</b> | <b>0.573</b> | <b>0.091</b> | <b>0.158</b> | <b>0.428</b> | <b>0.538</b> | <b>0.110</b> | <b>0.204</b> | <b>0.490</b> | <b>0.651</b> | <b>0.161</b> | <b>0.247</b> |
