# Supplementary material
Source: publisher figshare collection journal article supplement (https://tandf.figshare.com/articles/dataset/_/3444905)
Supplement: Supplementary file 2 [file 1]

**Table S1** PIC values of 20 SSR markers on the entire collection, on each accession or group. "Null" indicates the absence of amplification and "M" the absence of polymorphism.

| Accession                 | ACM004       | ACM006       | ACM045       | ACM091       | ACM101       | ACM119       | ACM124       | ACM134      | ACM138       | ACM146      | ACM187       | ACM387       | ACM443      | ACM446      | ACM449       | ACM463       | ACM504       | ACM520       | AMS14        | AMS16        | Mean         |
|---------------------------|--------------|--------------|--------------|--------------|--------------|--------------|--------------|-------------|--------------|-------------|--------------|--------------|-------------|-------------|--------------|--------------|--------------|--------------|--------------|--------------|--------------|
| Ameixenda                 | 0.55         | M            | 0.56         | 0.14         | 0.38         | 0.30         | 0.14         | 0.56        | 0.58         | 0.24        | 0.35         | 0.14         | 0.47        | 0.58        | 0.48         | 0.14         | 0.37         | 0.42         | 0.57         | 0.37         | 0.39         |
| Baldaio                   | 0.38         | 0.14         | 0.36         | M            | 0.30         | 0.37         | 0.46         | 0.36        | 0.30         | 0.38        | 0.48         | 0.35         | 0.14        | 0.37        | 0.37         | 0.30         | 0.50         | 0.36         | 0.35         | 0.57         | 0.36         |
| Betanzos2                 | 0.42         | M            | 0.58         | 0.24         | 0.42         | M            | 0.37         | 0.35        | 0.42         | 0.38        | 0.37         | 0.37         | 0.27        | 0.42        | 0.58         | 0.53         | 0.35         | 0.35         | 0.80         | 0.60         | 0.43         |
| Bordons                   | 0.54         | 0.48         | 0.42         | 0.30         | 0.42         | M            | 0.54         | 0.68        | 0.30         | 0.38        | 0.42         | 0.14         | 0.37        | 0.38        | 0.45         | 0.30         | 0.35         | 0.38         | 0.70         | 0.66         | 0.43         |
| Caldas de Reis            | 0.55         | 0.42         | 0.62         | M            | 0.50         | M            | 0.24         | 0.62        | 0.48         | 0.35        | 0.35         | 0.37         | 0.64        | 0.27        | 0.60         | 0.58         | 0.35         | 0.48         | 0.60         | 0.70         | 0.48         |
| Cea                       | M            | 0.50         | 0.56         | 0.35         | 0.37         | 0.30         | 0.37         | 0.14        | 0.37         | 0.38        | 0.37         | 0.24         | 0.37        | 0.42        | 0.14         | 0.50         | 0.30         | 0.69         | 0.71         | 0.48         | 0.40         |
| Chata-Miño                | 0.59         | 0.24         | 0.50         | M            | 0.14         | 0.14         | 0.37         | 0.54        | 0.55         | 0.38        | 0.42         | 0.14         | 0.14        | 0.54        | 0.46         | 0.55         | 0.38         | 0.14         | 0.74         | 0.62         | 0.40         |
| A Guarda                  | 0.37         | 0.27         | 0.50         | 0.24         | 0.50         | 0.37         | 0.59         | 0.35        | M            | 0.38        | 0.37         | M            | 0.33        | 0.35        | 0.37         | 0.55         | M            | 0.55         | 0.55         | 0.75         | 0.43         |
| Mondoñedo                 | 0.48         | 0.14         | 0.54         | M            | 0.35         | 0.30         | 0.24         | 0.42        | 0.38         | 0.38        | 0.42         | 0.30         | 0.46        | 0.14        | 0.50         | 0.54         | 0.35         | 0.59         | 0.60         | 0.48         | 0.40         |
| Oimbra                    | 0.14         | 0.36         | 0.14         | M            | 0.14         | 0.24         | 0.35         | 0.54        | 0.37         | 0.30        | 0.14         | 0.30         | 0.35        | 0.35        | 0.37         | M            | 0.35         | 0.48         | 0.64         | 0.58         | 0.34         |
| Outes                     | 0.46         | 0.14         | 0.46         | M            | 0.62         | 0.14         | 0.36         | 0.16        | 0.55         | 0.24        | 0.14         | 0.38         | 0.50        | 0.30        | 0.58         | 0.54         | 0.36         | 0.45         | 0.75         | 0.64         | 0.41         |
| Ponteareas                | 0.14         | 0.55         | 0.36         | 0.24         | 0.37         | M            | 0.14         | 0.45        | 0.48         | 0.14        | 0.35         | M            | 0.55        | 0.46        | 0.30         | 0.36         | 0.24         | 0.46         | 0.42         | 0.83         | 0.38         |
| Ribadeo2                  | 0.54         | 0.16         | 0.48         | M            | 0.42         | 0.24         | M            | 0.38        | 0.50         | 0.37        | 0.14         | 0.38         | 0.37        | 0.35        | 0.46         | 0.50         | 0.37         | 0.58         | 0.80         | 0.58         | 0.42         |
| San Julián                | 0.42         | M            | 0.14         | M            | 0.45         | 0.24         | 0.45         | 0.45        | 0.54         | 0.38        | 0.30         | 0.24         | 0.35        | 0.47        | 0.42         | 0.59         | 0.35         | 0.36         | 0.55         | 0.64         | 0.41         |
| Vilagarcía2               | 0.14         | 0.54         | 0.30         | 0.30         | 0.36         | M            | 0.50         | 0.30        | 0.48         | 0.37        | 0.37         | 0.33         | 0.46        | 0.42        | 0.60         | 0.45         | 0.38         | 0.56         | 0.68         | 0.36         | 0.42         |
| <b>Galician landraces</b> | <b>0.51</b>  | <b>0.37</b>  | <b>0.62</b>  | <b>0.17</b>  | <b>0.53</b>  | <b>0.23</b>  | <b>0.49</b>  | <b>0.62</b> | <b>0.59</b>  | <b>0.36</b> | <b>0.44</b>  | <b>0.35</b>  | <b>0.57</b> | <b>0.50</b> | <b>0.53</b>  | <b>0.60</b>  | <b>0.41</b>  | <b>0.65</b>  | <b>0.86</b>  | <b>0.79</b>  | <b>0.51</b>  |
| BGHZ0226                  | 0.14         | M            | 0.35         | 0.35         | M            | 0.14         | M            | 0.39        | 0.48         | 0.38        | M            | 0.38         | 0.42        | 0.54        | M            | M            | 0.35         | 0.45         | 0.54         | 0.14         | 0.36         |
| BGHZ2406                  | 0.58         | 0.55         | 0.42         | 0.36         | 0.14         | 0.54         | 0.30         | 0.64        | 0.14         | 0.37        | 0.35         | M            | 0.35        | 0.14        | 0.30         | 0.48         | 0.27         | 0.30         | 0.58         | 0.62         | 0.39         |
| BGHZ0267                  | 0.45         | 0.24         | 0.38         | 0.24         | 0.24         | 0.30         | 0.14         | 0.52        | 0.62         | 0.38        | 0.30         | 0.38         | 0.24        | 0.55        | 0.36         | 0.36         | 0.24         | 0.30         | 0.42         | 0.58         | 0.36         |
| BGHZ3533                  | 0.14         | 0.46         | 0.24         | 0.30         | 0.35         | 0.24         | M            | 0.48        | 0.42         | 0.35        | 0.37         | M            | 0.42        | 0.54        | 0.48         | M            | 0.50         | 0.30         | 0.64         | 0.68         | 0.41         |
| HRIGRU10093               | 0.46         | 0.37         | M            | 0.24         | 0.35         | 0.37         | 0.37         | 0.53        | 0.14         | 0.38        | 0.30         | M            | 0.64        | 0.58        | 0.36         | 0.36         | M            | 0.27         | M            | 0.74         | 0.40         |
| <b>Spanish landraces</b>  | <b>0.46</b>  | <b>0.50</b>  | <b>0.37</b>  | <b>0.42</b>  | <b>0.25</b>  | <b>0.46</b>  | <b>0.25</b>  | <b>0.73</b> | <b>0.64</b>  | <b>0.37</b> | <b>0.35</b>  | <b>0.25</b>  | <b>0.63</b> | <b>0.65</b> | <b>0.34</b>  | <b>0.32</b>  | <b>0.54</b>  | <b>0.46</b>  | <b>0.63</b>  | <b>0.77</b>  | <b>0.47</b>  |
| ALL1437                   | 0.24         | M            | 0.50         | M            | 0.38         | M            | M            | null        | M            | 0.38        | null         | null         | 0.55        | 0.38        | 0.38         | 0.59         | M            | 0.54         | 0.30         | M            | 0.42         |
| ALL671                    | 0.48         | 0.48         | 0.60         | 0.37         | 0.46         | 0.46         | 0.46         | 0.33        | 0.14         | 0.35        | 0.45         | 0.35         | 0.37        | 0.24        | 0.24         | 0.55         | 0.54         | 0.72         | 0.42         | 0.30         | 0.41         |
| ALL669                    | 0.30         | 0.55         | 0.45         | 0.14         | 0.24         | 0.24         | 0.58         | 0.35        | 0.37         | 0.38        | 0.14         | 0.35         | 0.24        | 0.70        | M            | 0.57         | 0.30         | 0.38         | 0.64         | 0.55         | 0.39         |
| ALL39                     | 0.48         | 0.14         | 0.33         | M            | 0.42         | M            | 0.37         | 0.27        | 0.24         | 0.37        | 0.30         | 0.45         | 0.14        | 0.35        | 0.14         | 0.30         | 0.24         | 0.69         | 0.56         | 0.46         | 0.35         |
| ALL1608                   | 0.24         | 0.50         | 0.62         | 0.38         | 0.37         | 0.42         | 0.46         | 0.36        | 0.58         | 0.38        | 0.35         | 0.36         | 0.62        | 0.48        | 0.50         | 0.65         | 0.42         | 0.65         | 0.53         | 0.78         | 0.48         |
| HRIGRU11280               | 0.30         | 0.55         | 0.55         | 0.14         | 0.46         | 0.24         | 0.35         | 0.46        | 0.14         | 0.30        | M            | 0.35         | 0.14        | 0.46        | 0.58         | 0.48         | 0.38         | 0.64         | 0.75         | 0.66         | 0.42         |
| HRIGRU12465               | 0.14         | 0.48         | 0.62         | 0.50         | 0.45         | 0.30         | 0.48         | 0.58        | 0.67         | 0.36        | 0.35         | 0.38         | 0.46        | 0.30        | 0.48         | 0.53         | 0.24         | 0.60         | 0.81         | 0.71         | 0.47         |
| HRIGRU5517                | M            | 0.37         | 0.42         | 0.24         | 0.42         | 0.35         | 0.30         | 0.30        | 0.24         | 0.38        | 0.14         | 0.24         | 0.62        | 0.24        | 0.35         | 0.30         | 0.14         | 0.55         | 0.62         | 0.64         | 0.36         |
| ALL1597                   | 0.55         | 0.35         | 0.55         | 0.14         | 0.35         | 0.30         | M            | 0.36        | 0.57         | 0.38        | M            | 0.30         | 0.30        | 0.30        | 0.30         | 0.14         | 0.58         | M            | 0.62         | 0.73         | 0.40         |
| HRIGRU9583                | 0.14         | 0.36         | 0.57         | M            | 0.37         | 0.24         | 0.14         | 0.48        | 0.65         | 0.38        | 0.14         | 0.30         | 0.42        | 0.60        | 0.46         | 0.45         | 0.56         | 0.30         | 0.68         | 0.50         | 0.41         |
| ALL1440                   | 0.42         | 0.14         | 0.42         | 0.48         | 0.30         | M            | 0.42         | 0.53        | 0.58         | 0.37        | 0.37         | 0.24         | 0.48        | 0.37        | 0.58         | 0.62         | 0.54         | 0.54         | 0.55         | 0.69         | 0.45         |
| <b>European landraces</b> | <b>0.43</b>  | <b>0.71</b>  | <b>0.62</b>  | <b>0.58</b>  | <b>0.47</b>  | <b>0.53</b>  | <b>0.63</b>  | <b>0.65</b> | <b>0.67</b>  | <b>0.43</b> | <b>0.50</b>  | <b>0.41</b>  | <b>0.68</b> | <b>0.57</b> | <b>0.54</b>  | <b>0.59</b>  | <b>0.48</b>  | <b>0.71</b>  | <b>0.83</b>  | <b>0.81</b>  | <b>0.59</b>  |
| <b>GLOBAL</b>             | <b>0.48</b>  | <b>0.55</b>  | <b>0.61</b>  | <b>0.40</b>  | <b>0.54</b>  | <b>0.41</b>  | <b>0.53</b>  | <b>0.69</b> | <b>0.66</b>  | <b>0.39</b> | <b>0.46</b>  | <b>0.36</b>  | <b>0.63</b> | <b>0.58</b> | <b>0.52</b>  | <b>0.59</b>  | <b>0.51</b>  | <b>0.73</b>  | <b>0.85</b>  | <b>0.83</b>  | <b>0.57</b>  |
| <b>% Polymorphism</b>     | <b>93.55</b> | <b>83.87</b> | <b>96.77</b> | <b>64.52</b> | <b>96.77</b> | <b>74.19</b> | <b>83.87</b> | <b>100</b>  | <b>93.55</b> | <b>100</b>  | <b>90.32</b> | <b>83.87</b> | <b>100</b>  | <b>100</b>  | <b>93.55</b> | <b>90.32</b> | <b>90.32</b> | <b>96.77</b> | <b>96.77</b> | <b>96.77</b> | <b>91.29</b> |
